# Supplementary material for: The mechanism of CO2 hydrogenation to CH3OH on MZrOx (M = Ga, Cr) solid-solution catalysts and effects of lattice strain
Source: Royal Society of Chemistry journal article supplement (doi:10.1039/d4cy00024b), 2024-01-01
Supplement: d4cy00024b1.pdf [file d4cy00024b1.pdf]

The Mechanism of CO<sub>2</sub> Hydrogenation to CH<sub>3</sub>OH on MZrO<sub>x</sub> (M = Ga,  
Cr) Solid-Solution Catalysts and Effects of Lattice Strain

Huili Lu, Deshuai Yang, Zhaoxu Chen\*

*Institute of Theoretical and Computational Chemistry, School of Chemistry and Chemical Engineering,  
Nanjing University, Nanjing 210023, People's Republic of China*

E-mail:

zxchen@nju.edu.cn;

(a) Ga@ZrO<sub>2</sub>(101)

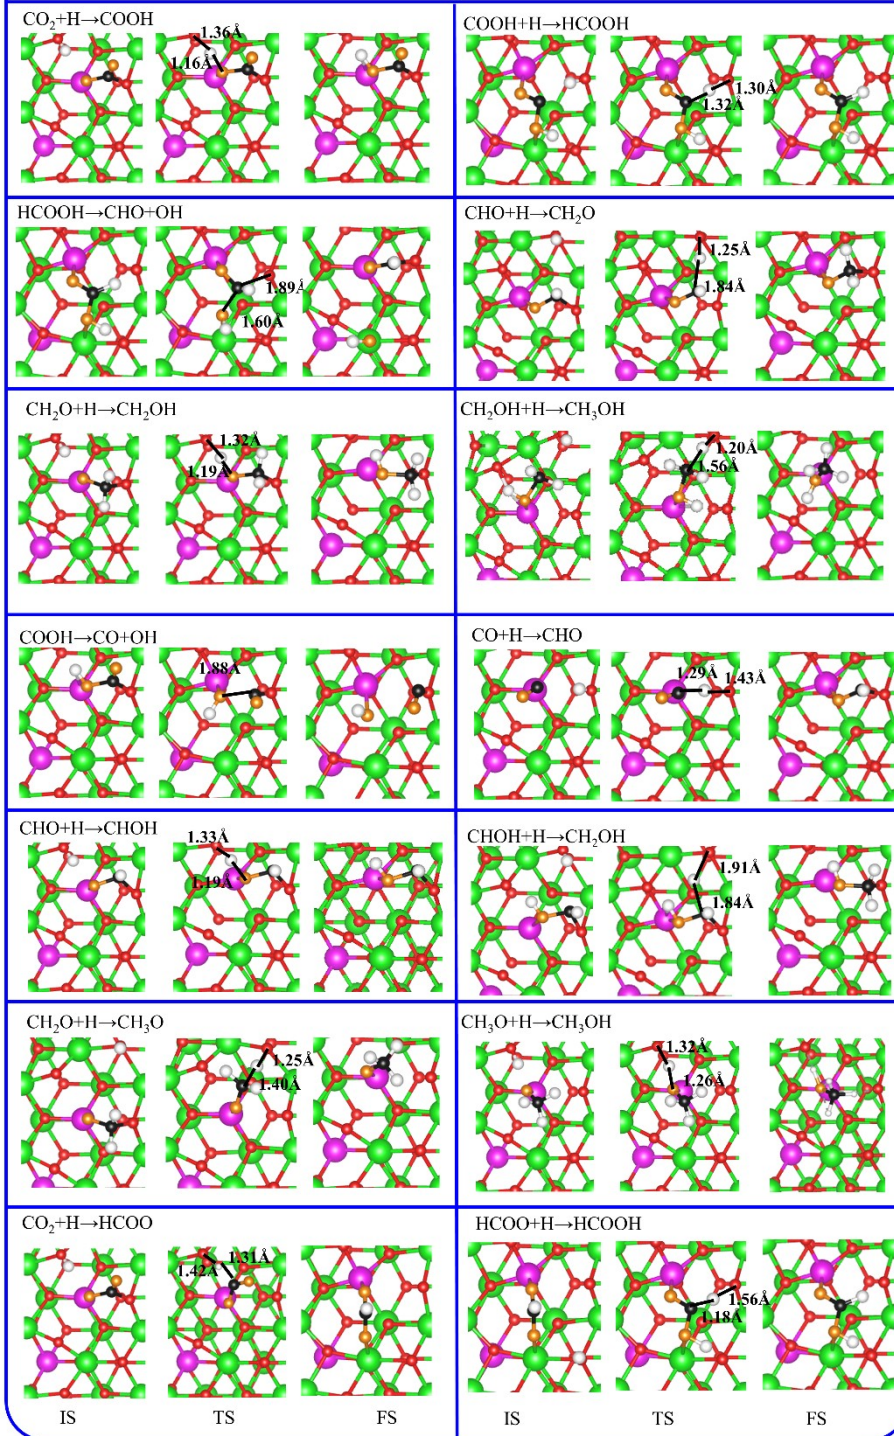

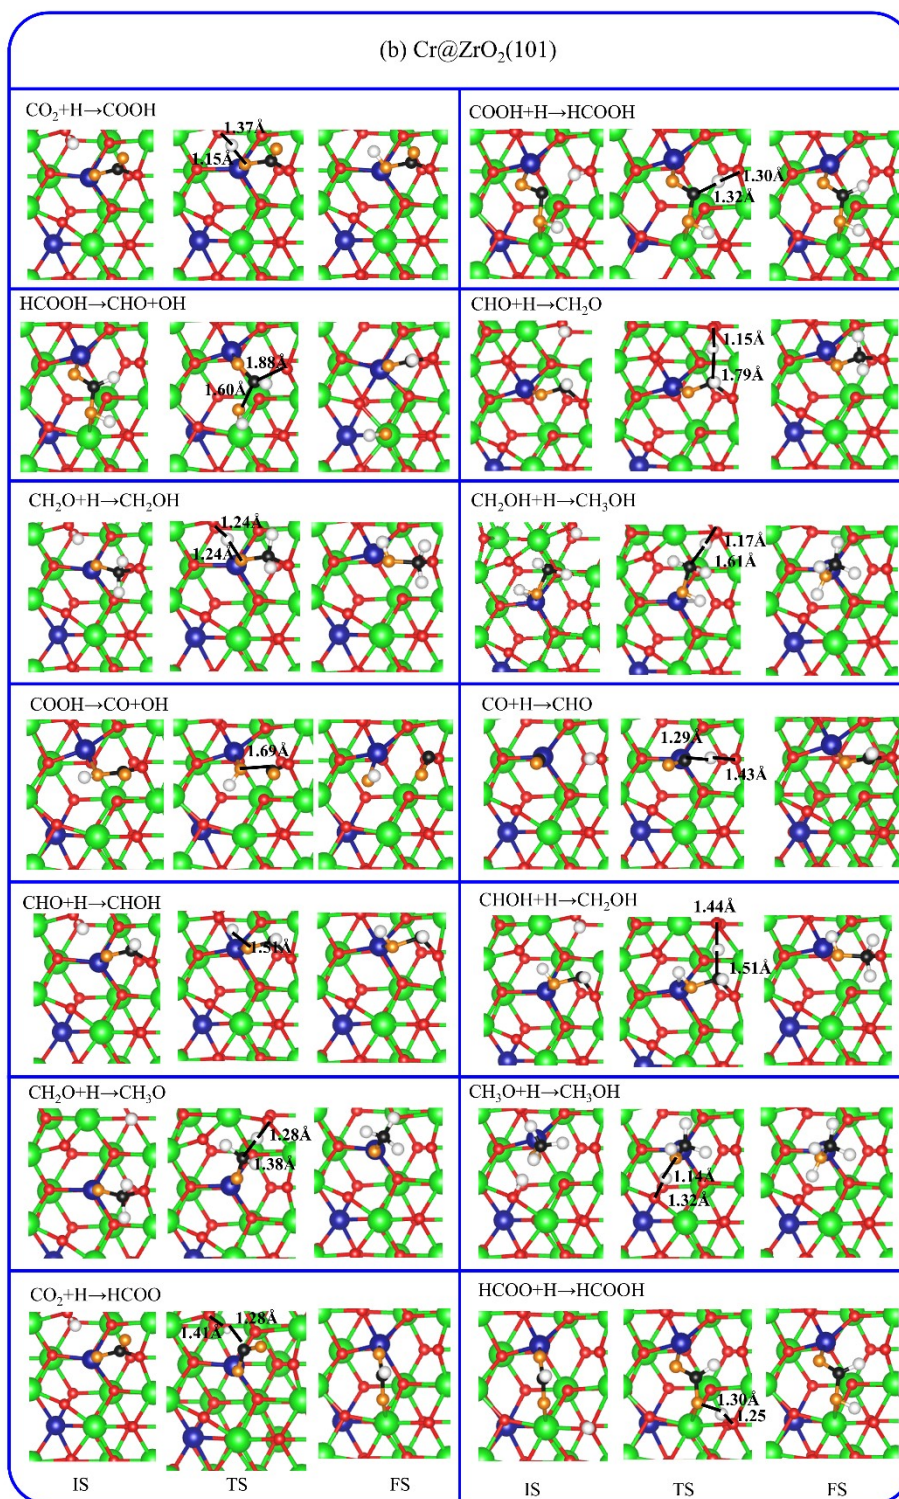

**Figure S1.** The initial state (IS), transition state (TS) and final state (FS) of elementary steps involved in CO<sub>2</sub> hydrogenation to methanol on the GaZrO<sub>x</sub>(101) (a) and CrZrO<sub>x</sub>(101) (b) surfaces.

**Table S1.** The barrier ( $E_a$ ) and reaction heat ( $\Delta H$ ) without zero-point energy corrections of elementary steps involved in CO<sub>2</sub> hydrogenation to methanol on the MZrO<sub>x</sub>(101) (M = Ga, Cr) surfaces with strain from -1% to 1%<sup>a</sup>.

| Elementary step                              | $E_a/\text{eV}$ (-1%/0/1%) |                          | $\Delta H/\text{eV}$ (-1%/0/1%) |                          |
|----------------------------------------------|----------------------------|--------------------------|---------------------------------|--------------------------|
|                                              | GaZrO <sub>x</sub> (101)   | CrZrO <sub>x</sub> (101) | GaZrO <sub>x</sub> (101)        | CrZrO <sub>x</sub> (101) |
| CO*+H*→CHO*+*                                | 0.60/0.62/2.13             | 1.66/1.86/2.75           | -0.25/-0.40/-0.49               | -0.45/-0.54/-0.61        |
| CHOH*+H*→CH <sub>2</sub> OH*+*               | 1.22/1.68/1.49             | 0.94/0.64/1.08           | -1.38/-1.20/-1.21               | -1.25/-1.02/-1.05        |
| CH <sub>2</sub> OH*+H*→CH <sub>3</sub> OH*+* | 0.52/0.22/0.75             | 0.78/1.04/1.01           | -2.51/-2.34/-2.05               | -2.29/-2.21/-1.95        |
| COOH*+H*→HCOOH*+*                            | 0.35/0.25/0.75             | 0.72/0.62/1.01           | 0.00/0.08/0.47                  | 0.05/-0.15/0.22          |
| CH <sub>2</sub> O*+H*→CH <sub>3</sub> O*+*   | 1.29/1.27/2.40             | 2.46/2.13/2.63           | 0.29/0.32/0.49                  | 1.51/0.28/0.57           |
| CHO*+H*→CH <sub>2</sub> O*+*                 | 0.67/0.53/0.68             | 0.91/0.52/1.03           | -1.81/-1.70/-1.70               | -1.49/-1.39/-1.31        |
| CO <sub>2</sub> *+H*→HCOO*+*                 | 1.41/1.40/1.50             | 1.66/1.04/2.76           | 0.69/0.76/0.55                  | -0.26/-0.22/-0.01        |
| CO <sub>2</sub> *+H*→COOH*+*                 | 0.70/0.81/0.89             | 0.93/0.70/1.30           | 0.68/0.68/0.78                  | 0.60/0.59/0.79           |
| CHO*+H*→CHOH*+*                              | 0.26/0.81/0.98             | 0.98/0.84/2.17           | 0.12/0.24/0.80                  | 0.54/0.64/1.37           |
| CH <sub>2</sub> O*+H*→CH <sub>2</sub> OH*+*  | 0.84/0.63/0.97             | 0.85/0.44/0.90           | 0.32/0.41/0.39                  | 0.43/0.28/0.44           |
| CH <sub>3</sub> O*+H*→CH <sub>3</sub> OH*+*  | 0.23/0.38/0.50             | 1.36/0.48/1.12           | 0.14/0.17/0.30                  | -1.81/0.27/0.09          |
| H*+HCOO*→HCOOH*+*                            | 2.19/1.85/2.05             | 1.79/1.43/2.03           | 1.58/1.65/2.11                  | 1.58/1.42/1.84           |
| H*+OH*→H <sub>2</sub> O*+*                   | 1.09/0.61/1.32             | 1.09/0.72/0.70           | 0.15/0.24/0.40                  | 0.17/0.24/0.34           |
| HCOOH*+*→CHO*+OH*                            | 0.54/0.75/0.69             | 1.66/1.38/1.60           | -1.20/-1.11/-1.51               | -1.25/-1.08/-1.19        |
| COOH*+*→CO*+OH*                              | 1.64/1.16/1.38             | 1.99/0.96/2.34           | -0.25/-0.14/-0.28               | 1.11/0.24/1.15           |
| H <sub>2</sub> *+*→2H*                       | 1.22/1.25/0.96             | 1.53/1.42/1.64           | 0.82/1.24/0.37                  | 0.87/0.79/0.72           |

a: The data of each column represents the result at -1%, 0 and 1% strain respectively.

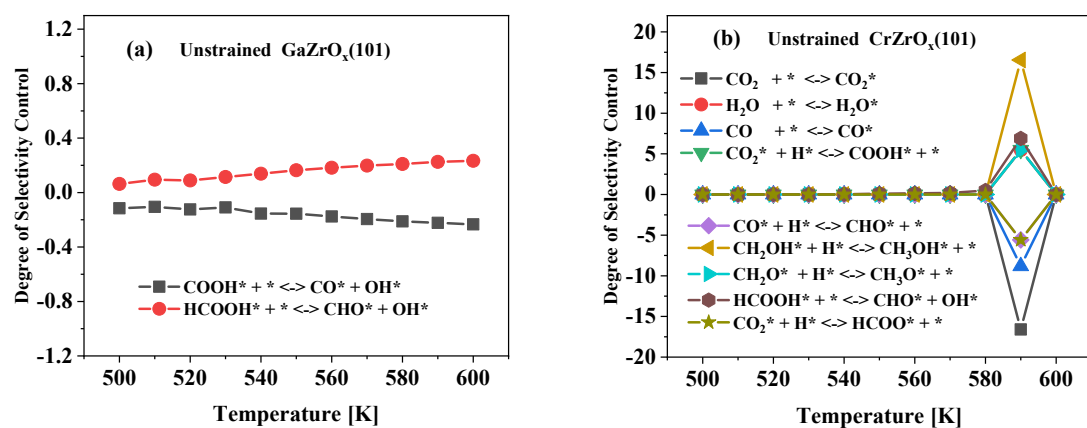

**Figure S2.** Degree of selectivity control (DSC) of methanol as a function of temperature on the GaZrO<sub>x</sub>(101) (a) and CrZrO<sub>x</sub>(101) (b) surface with strain from -1% to 1%. Simulation conditions: CO<sub>2</sub>:H<sub>2</sub> = 1:3, p = 20 bar. Only elementary steps with the DSC coefficients greater than 0.2 (absolute values) are shown.

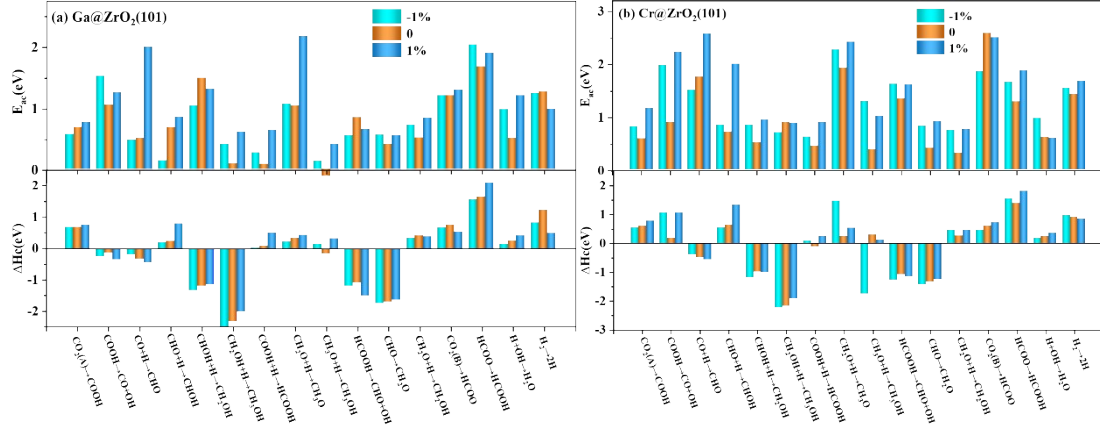

**Figure S3.** Zero-point corrected barriers ( $E_{ac}$ ) and reaction heats ( $\Delta Hc$ ) of elementary steps involved in  $\text{CO}_2$  hydrogenation to methanol over the  $\text{GaZrO}_x(101)$  ((a), (b)) and  $\text{CrZrO}_x(101)$  ((c), (d)) surfaces with strain from -1% to 1%.

**Table S2.** The bond length ( $d$ ,  $\text{\AA}$ ) of the initial and transition states of the step of  $\text{HCOOH} \rightarrow \text{CHO} + \text{OH}$  on  $\text{MZrO}_x(101)$  ( $M = \text{Ga}, \text{Cr}$ ) surfaces. All unit are in  $\text{\AA}$ . For the atomic numbering, please see Figure 1c in the body text.

|                                | GaZrO <sub>x</sub> (101) |        |        |        |        |        | CrZrO <sub>x</sub> (101) |        |        |        |        |        |
|--------------------------------|--------------------------|--------|--------|--------|--------|--------|--------------------------|--------|--------|--------|--------|--------|
|                                | IS                       |        | TS     |        |        |        | IS                       |        | TS     |        |        |        |
| M-O <sub>M</sub>               | 2.2859                   | 2.0506 | 2.3467 | 1.9168 | 1.9832 | 2.0009 | 2.2364                   | 2.1264 | 2.1333 | 1.9767 | 1.9834 | 2.0033 |
| Zr-O <sub>Z</sub>              | 2.5760                   | 2.6399 | 2.7454 | 2.2908 | 2.3001 | 2.3211 | 2.5506                   | 2.6146 | 2.5189 | 2.2752 | 2.2999 | 2.3229 |
| C-O <sub>M</sub>               | 1.2120                   | 1.2578 | 1.2081 | 1.2871 | 1.2532 | 1.2549 | 1.2109                   | 1.2396 | 1.2303 | 1.2439 | 1.2531 | 1.2655 |
| C-O <sub>Z</sub>               | 1.3573                   | 1.3666 | 1.3539 | 1.5431 | 1.6005 | 1.6162 | 1.3598                   | 1.3500 | 1.3409 | 1.5465 | 1.6004 | 1.6164 |
| C-H <sub>2</sub>               | 1.1015                   | 1.1778 | 1.1070 | 1.0922 | 1.0983 | 1.0938 | 1.1037                   | 1.1158 | 1.1008 | 1.0884 | 1.0981 | 1.1091 |
| O <sub>Z</sub> -H <sub>1</sub> | 0.9798                   | 1.0345 | 0.9800 | 0.9953 | 0.9881 | 0.9866 | 1.1037                   | 1.0235 | 1.0698 | 0.9840 | 0.9880 | 0.9978 |
| C-O <sub>1</sub>               | ---                      | ---    | ---    | 1.6528 | 1.8851 | 1.8579 | ---                      | ---    | ---    | 1.9342 | 1.8846 | 1.9034 |
| H <sub>2</sub> -O <sub>1</sub> | 3.7242                   | 1.5652 | 3.7725 | 2.0301 | 2.1236 | 2.1236 | 3.6934                   | 1.8142 | 2.5375 | 2.1174 | 2.1234 | 2.1446 |
| O <sub>2</sub> -H <sub>1</sub> | 2.8582                   | 1.6821 | 3.0432 | 1.8640 | 2.6800 | 2.7046 | 2.1602                   | 1.7786 | 1.5788 | 2.6431 | 2.6796 | 2.7063 |

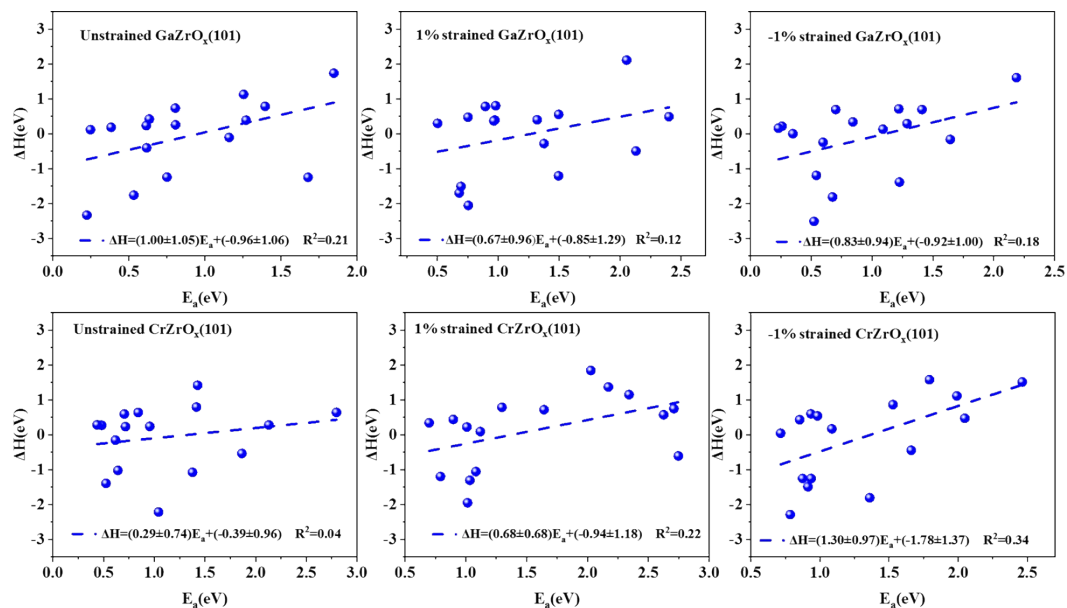

**Figure S4.** BEP relationship on  $MZrO_x(101)$  ( $M = Ga, Cr$ ) surfaces with strain from -1% to 1%.

**Table S3.** The absolute errors (AEs, eV) between predicted barrier by BEP relationship between the oxygen hydrogenation or carbon hydrogenation elementary steps and calculated barrier by DFT on  $MZrO_x(101)$  ( $M = Ga, Cr$ ) with strain from -1% to 1%.

| Absolute Errors(AEs)                         | GaZrO <sub>x</sub> (101) |      |      | CrZrO <sub>x</sub> (101) |      |      |
|----------------------------------------------|--------------------------|------|------|--------------------------|------|------|
|                                              | -1%                      | 0    | 1%   | -1%                      | 0    | 1%   |
| CO*+H*→CHO*+*                                | 0.78                     | 0.41 | 0.51 | 0.40                     | 0.28 | 0.87 |
| CHOH*+H*→CH <sub>2</sub> OH*+*               | 1.09                     | 1.26 | 0.73 | 0.13                     | 0.16 | 0.08 |
| CH <sub>2</sub> OH*+H*→CH <sub>3</sub> OH*+* | 1.40                     | 1.21 | 1.00 | 0.93                     | 1.33 | 0.93 |
| C-H bond                                     |                          |      |      |                          |      |      |
| COOH*+H*→HCOOH*+*                            | 1.31                     | 1.22 | 1.53 | 1.50                     | 1.05 | 1.25 |
| CH <sub>2</sub> O*+H*→CH <sub>3</sub> O*+*   | 0.51                     | 0.70 | 0.26 | 0.36                     | 0.33 | 0.40 |
| CHO*+H*→CH <sub>2</sub> O*+*                 | 0.88                     | 0.87 | 0.59 | 0.33                     | 0.12 | 0.29 |
| CO <sub>2</sub> (B)*+H*→HCOO*+*              | 0.77                     | 1.00 | 1.03 | 0.06                     | 0.18 | 0.51 |
| O-H bond                                     |                          |      |      |                          |      |      |
| CO <sub>2</sub> (A)*+H*→COOH*+*              | 0.29                     | 0.19 | 0.23 | 0.44                     | 0.10 | 0.04 |
| CHO*+H*→CHOH*+*                              | 0.11                     | 0.29 | 0.16 | 0.36                     | 0.02 | 0.24 |
| CH <sub>2</sub> O*+H*→CH <sub>2</sub> OH*+*  | 0.16                     | 0.06 | 0.24 | 0.31                     | 0.10 | 0.09 |
| CH <sub>3</sub> O*+H*→CH <sub>3</sub> OH*+*  | 0.07                     | 0.10 | 0.18 | 2.13                     | 0.04 | 0.47 |
| H*+HCOO*→HCOOH*+*                            | 0.21                     | 0.03 | 0.29 | 1.08                     | 0.06 | 0.38 |
| H*+OH*→H <sub>2</sub> O*+*                   | 0.53                     | 0.10 | 0.62 | 0.05                     | 0.28 | 0.19 |

**Table S4.** The slope, intercept (eV), correlation ( $R^2$ ) of BEP relationship between the oxygen hydrogenation or carbon hydrogenation elementary steps on GaZrO<sub>x</sub>(101)/CrZrO<sub>x</sub>(101) surfaces with strain from -1% to 1%, the mean/maximum absolute error(eV) between predicted value by BEP and calculated value by DFT.

| C-H bond               | GaZrO <sub>x</sub> (101) |            |            | CrZrO <sub>x</sub> (101) |            |            |
|------------------------|--------------------------|------------|------------|--------------------------|------------|------------|
|                        | -1%                      | 0          | 1%         | -1%                      | 0          | 1%         |
| slope                  | 1.17±2.28                | 0.78±1.64  | 0.78±1.24  | 1.49±0.99                | 0.76±0.73  | 0.74±0.79  |
| intercept              | -1.72±2.17               | -1.30±1.66 | -1.64±1.90 | -2.52±1.48               | -1.68±1.16 | -1.78±1.52 |
| R <sup>2</sup>         | 0.17                     | 0.15       | 0.24       | 0.65                     | 0.47       | 0.41       |
| mean absolute error    | 0.96                     | 0.95       | 0.81       | 0.53                     | 0.49       | 0.62       |
| maximum absolute error | 1.40                     | 1.26       | 1.53       | 1.50                     | 1.33       | 1.25       |

  

| O-H bond               | GaZrO <sub>x</sub> (101) |            |            | CrZrO <sub>x</sub> (101) |            |            |
|------------------------|--------------------------|------------|------------|--------------------------|------------|------------|
|                        | -1%                      | 0          | 1%         | -1%                      | 0          | 1%         |
| slope                  | 0.67±0.42                | 1.11±0.33  | 1.09±0.68  | 0.40±3.14                | 1.19±0.40  | 0.99±0.51  |
| intercept              | -0.07±0.46               | -0.34±0.32 | -0.43±0.82 | -0.21±3.81               | -0.34±0.33 | -0.54±0.75 |
| R <sup>2</sup>         | 0.72                     | 0.92       | 0.72       | 0.02                     | 0.90       | 0.79       |
| mean absolute error    | 0.23                     | 0.13       | 0.29       | 0.73                     | 0.10       | 0.24       |
| maximum absolute error | 0.53                     | 0.29       | 0.62       | 2.13                     | 0.28       | 0.47       |

**Table S5.** The absolute errors (AEs, eV) between predicted barrier by TSS relationship between the oxygen hydrogenation or carbon hydrogenation elementary steps and calculated barrier by DFT on MZrO<sub>x</sub>(101) (M = Ga, Cr) with strain from -1% to 1%.

| Absolute Errors(AEs)                         | GaZrO <sub>x</sub> (101) |      |       | CrZrO <sub>x</sub> (101) |      |      |
|----------------------------------------------|--------------------------|------|-------|--------------------------|------|------|
|                                              | -1%                      | 0    | 1%    | -1%                      | 0    | 1%   |
| C-H bond                                     |                          |      |       |                          |      |      |
| CO*+H*→CHO*+*                                | 0.39                     | 0.33 | 0.35  | 0.16                     | 0.26 | 0.68 |
| CHOH*+H*→CH <sub>2</sub> OH*+*               | 0.53                     | 0.94 | 0.53  | 0.01                     | 0.03 | 0.05 |
| CH <sub>2</sub> OH*+H*→CH <sub>3</sub> OH*+* | 0.43                     | 0.67 | 0.80  | 0.94                     | 0.97 | 1.25 |
| COOH*+H*→HCOOH*+*                            | 0.30                     | 0.46 | 0.02  | 0.40                     | 0.43 | 0.42 |
| CH <sub>2</sub> O*+H*→CH <sub>3</sub> O*+*   | 0.27                     | 0.32 | 0.62  | 0.97                     | 0.59 | 0.74 |
| CHO*+H*→CH <sub>2</sub> O*+*                 | 0.06                     | 0.23 | 0.32  | 0.38                     | 0.70 | 0.56 |
| CO <sub>2</sub> *+H*→HCOO*+*                 | 0.37                     | 0.43 | 0.351 | 0.57                     | 1.27 | 0.76 |
| O-H bond                                     |                          |      |       |                          |      |      |
| CO <sub>2</sub> *+H*→COOH*+*                 | 0.18                     | 0.17 | 0.12  | 0.03                     | 0.21 | 0.17 |
| CHO*+H*→CHOH*+*                              | 0.60                     | 0.02 | 0.10  | 0.17                     | 0.14 | 0.78 |

|                                                                        |      |      |      |      |      |      |
|------------------------------------------------------------------------|------|------|------|------|------|------|
| $\text{CH}_2\text{O}^*+\text{H}^*\rightarrow\text{CH}_2\text{OH}^{**}$ | 0.17 | 0.08 | 0.06 | 0.25 | 0.21 | 0.35 |
| $\text{CH}_3\text{O}^*+\text{H}^*\rightarrow\text{CH}_3\text{OH}^{**}$ | 0.85 | 0.58 | 0.79 | 0.36 | 0.35 | 0.29 |
| $\text{H}^*+\text{HCOO}^*\rightarrow\text{HCOOH}^{**}$                 | 1.07 | 0.85 | 0.67 | 0.37 | 0.43 | 0.47 |
| $\text{H}^*+\text{OH}^*\rightarrow\text{H}_2\text{O}^{**}$             | 0.03 | 0.34 | 0.03 | 0.28 | 0.22 | 0.79 |

**Table S6.** The slope, intercept (eV), correlation ( $R^2$ ) of TSS relationship between the oxygen hydrogenation or carbon hydrogenation elementary steps on  $\text{GaZrO}_x(101)/\text{CrZrO}_x(101)$  surfaces with strain from -1% to 1%, the mean/maximum absolute error(eV) between predicted value by TSS and calculated value by DFT.

| C-H bond               | $\text{GaZrO}_x(101)$ |            |            | $\text{CrZrO}_x(101)$ |            |            |
|------------------------|-----------------------|------------|------------|-----------------------|------------|------------|
|                        | -1%                   | 0          | 1%         | -1%                   | 0          | 1%         |
| slope                  | 1.21±0.43             | 1.13±0.60  | 1.51±0.52  | 1.34±0.72             | 1.48±0.77  | 1.52±0.86  |
| intercept              | -1.64±1.66            | -1.34±2.34 | -3.34±2.04 | -2.78±3.08            | -3.46±3.43 | -4.13±3.99 |
| $R^2$                  | 0.86                  | 0.74       | 0.87       | 0.74                  | 0.75       | 0.71       |
| mean absolute error    | 0.34                  | 0.48       | 0.43       | 0.49                  | 0.61       | 0.64       |
| maximum absolute error | 0.53                  | 0.94       | 0.80       | 0.94                  | 1.27       | 1.25       |
| O-H bond               | $\text{GaZrO}_x(101)$ |            |            | $\text{CrZrO}_x(101)$ |            |            |
|                        | -1%                   | 0          | 1%         | -1%                   | 0          | 1%         |
| slope                  | 0.84±0.44             | 0.90±0.32  | 0.85±0.30  | 0.84±0.25             | 0.82±0.29  | 0.85±0.55  |
| intercept              | -0.06±2.37            | -0.34±1.72 | -0.33±1.60 | -0.35±1.32            | 0.22±1.63  | -0.50±3.24 |
| $R^2$                  | 0.79                  | 0.89       | 0.89       | 0.92                  | 0.89       | 0.70       |
| mean absolute error    | 0.48                  | 0.34       | 0.29       | 0.24                  | 0.26       | 0.47       |
| maximum absolute error | 1.07                  | 0.85       | 0.79       | 0.37                  | 0.43       | 0.79       |
